# Supplementary material for: Cell signaling and transcription factor genes expressed during whole body regeneration in a colonial chordate
Source: PubMed Central journal article supplement (PMC2576188; doi:10.1186/1471-213x-8-100), 2008-10-12
Supplement: 1471-213X-8-100-S1.pdf [file 1471-213X-8-100-S1.pdf]

**Table S1. Expressed gene products during early phases in *B. leachi* WBR that belong to cell communication and signaling and the top homologous match for each sequence as revealed by Blast analysis.**

| Seq. No | Genebank Accession No | SwissProt Homologue ID | Gene identity                                                             | Organism               | E-value | No of hits |
|---------|-----------------------|------------------------|---------------------------------------------------------------------------|------------------------|---------|------------|
| 1       | EW713271              | Q1MTB1_BRARE           | milk fat globule-EGF factor 8 protein                                     | <i>D. rerio</i>        | 5e-24   | 11         |
| 2       | EW713277              | Q7TQ50_MOUSE           | Transmembrane receptor Notch1                                             | <i>M. musculus</i>     | 4e-09   | 8          |
| 3       | EW713273              | Q6VEJ7_OREMO           | Receptor for activated PKC                                                | <i>O. mossambicus</i>  | 3e-77   | 7          |
| 4       | EW713274              | SOMA_SPAAU             | Somatotropin precursor                                                    | <i>S. aurata</i>       | 1e-102  | 6          |
| 5       | EW713272              | Q1RL58_CIOIN           | Zinc finger protein                                                       | <i>C. intestinalis</i> | 2e-09   | 3          |
| 6       | EW713275              | Q28GN8_XENTR           | BAX inhibitor 1                                                           | <i>X. tropicalis</i>   | 2e-48   | 3          |
| 7       | EW713276              | Q5R2J6_TRISI           | Zinc finger containing transactivation factor Sp5                         | <i>T. sinensis</i>     | 1e-09   | 2          |
| 8       | EW713270              | Q5RHV3_BRARE           | vertebrate dual-specificity tyrosine-(Y)-phosphorylation regulated kinase | <i>D. rerio</i>        | 8e-31   | 2          |
| 9       | EW713278              | 1433F_RAT              | 14-3-3 protein eta                                                        | <i>R. norvegicus</i>   | 1e-31   | 2          |
| 10      | EW713279              | Q1RL58_CIOIN           | Zinc finger protein                                                       | <i>C. intestinalis</i> | 1e-60   | 1          |
| 11      | EW713280              | Q54KX0_DICDI           | GATA-binding transcription factor                                         | <i>D. discoideum</i>   | 5e-30   | 1          |
| 12      | EW713281              | O74649_CRYNE           | Rho1 GTPase                                                               | <i>C. neoformans</i>   | 2e-07   | 1          |
| 13      | EW713282              | Q5PQK8_RAT             | Transforming growth factor beta regulated gene                            | <i>R. norvegicus</i>   | 3e-12   | 1          |
| 14      | EW713283              | Q6T388_FUCDI           | Rho family GTPase                                                         | <i>F. distichus</i>    | 1e-16   | 1          |
| 15      | EW713284              | Q1RL34_CIOIN           | Zinc finger protein                                                       | <i>C. intestinalis</i> | 1e-09   | 1          |
| 16      | EW713285              | IMB1_RAT               | Importin beta-1 subunit                                                   | <i>R. norvegicus</i>   | 4e-11   | 1          |
| 17      | EW713286              | Q8WUW5_HUMAN           | PRMT1 protein                                                             | <i>H. sapiens</i>      | 1e-62   | 1          |
| 18      | EW713287              | Q5CZY5_MOUSE           | Cnot2 protein                                                             | <i>M. musculus</i>     | 4e-46   | 1          |
| 19      | EW713288              | GPR89_BOVIN            | Protein GPR89A                                                            | <i>B. taurus</i>       | 2e-30   | 1          |
| 20      | EW713289              | MKNK2_XENTR            | MAPK-interacting serine/threonine-protein kinase 2                        | <i>X. tropicalis</i>   | 2e-36   | 1          |
| 21      | EW713290              | DNJA3_MOUSE            | DnaJ protein Tid-1                                                        | <i>M. musculus</i>     | 1e-29   | 1          |
| 22      | EW713291              | Q659T9_CIOIN           | Putative serine protease 7                                                | <i>C. intestinalis</i> | 1e-11   | 1          |
| 23      | EW713292              | Q5VNG7_ORYSA           | Putative DsPTP1 protein                                                   | <i>O. sativa</i>       | 4e-20   | 1          |
| 24      | EW713293              | RDH14_HUMAN            | Retinol dehydrogenase 14                                                  | <i>H. sapiens</i>      | 0.069   | 1          |
| 25      | EW713294              | Q91YS9_MOUSE           | Eph receptor B3                                                           | <i>M. musculus</i>     | 1e-07   | 1          |
| 26      | EW713295              | Q5MD60_HUMAN           | Mitogen-activated protein kinase kinase kinase 4 isoform                  | <i>H. sapiens</i>      | 1e-44   | 1          |
| 27      | EW713296              | CREL1_MOUSE            | Cysteine-rich with EGF-like domain protein 1 precursor                    | <i>M. musculus</i>     | 1e-07   | 1          |
| 28      | EW713297              | Q86KZ2_DICDI           | TFIIH                                                                     | <i>D. discoideum</i>   | 6e-27   | 1          |
| 29      | EW713298              | Q2M1L3_HUMAN           | G protein-coupled receptor 133                                            | <i>H. sapiens</i>      | 3e-10   | 1          |
| 30      | EW713299              | Q2KIV3_BOVIN           | Similar to zinc responsive protein ZD7                                    | <i>B. taurus</i>       | 3e-12   | 1          |
| 31      | EW713300              | Q6P0P0_HUMAN           | Methyl-CpG binding domain protein                                         | <i>H. sapiens</i>      | 4e-10   | 1          |
| 32      | EW713301              | Q7ZWC1_BRARE           | Integrin beta 4 binding protein                                           | <i>D. rerio</i>        | 6e-38   | 1          |
| 33      | EW713302              | Q9Y1V3_POLMI           | Tunicate retinoic acid-inducible protease                                 | <i>P. misakiensis</i>  | 1e-38   | 1          |
| 34      | EW713303              | AKT1_BOVIN             | RAC-alpha serine/threonine-protein kinase                                 | <i>B. taurus</i>       | 1e-13   | 1          |

|    |                 |              |                                               |                           |       |   |
|----|-----------------|--------------|-----------------------------------------------|---------------------------|-------|---|
| 35 | <b>EW713304</b> | Q1RPV5_CIOIN | Zinc finger protein                           | <i>C. intestinalis</i>    | 5e-28 | 1 |
| 36 | <b>EW713305</b> | Q4H3E0_CIOIN | Transcription factor protein                  | <i>C. intestinalis</i>    | 1e-37 | 1 |
| 37 | <b>EW713306</b> | Q8N5U6_HUMAN | Ring finger protein 10                        | <i>H. sapiens</i>         | 2e-27 | 1 |
| 38 | <b>EW713307</b> | Q8AWF9_BUFBG | Zinc finger protein Yan                       | <i>B. gargarizans</i>     | 6e-12 | 1 |
| 39 | <b>EW713308</b> | Q4H2R0_CIOIN | Ci-STAT-b protein                             | <i>C. intestinalis</i>    | 1e-79 | 1 |
| 40 | <b>EW713309</b> | Q9BYI2_HUMAN | G kinase anchoring protein 1                  | <i>H. sapiens</i>         | 1e-04 | 1 |
| 41 | <b>EW713310</b> | Q6Y9Q3_BRAFL | TATA-binding protein isoform 2                | <i>B. floridae</i>        | 2e-29 | 1 |
| 42 | <b>EW713311</b> | Q25058_HELER | Fibropellin Ia                                | <i>H. erythrogramma</i>   | 3e-22 | 1 |
| 43 | <b>EW713312</b> | Q86SC9_CIOIN | IQ motif containing GTPase activating protein | <i>C. intestinalis</i>    | 3e-28 | 1 |
| 44 | <b>EW713313</b> | Q86SC9_CIOIN | IQ motif containing GTPase activating protein | <i>C. intestinalis</i>    | 6e-13 | 1 |
| 45 | <b>EW713314</b> | RBCC1_MOUSE  | RB1-inducible coiled-coil protein             | <i>M. musculus</i>        | 8e-11 | 1 |
| 46 | <b>EW713315</b> | Q5CZT6_BRARE | Zgc:113125                                    | <i>D. rerio</i>           | 1e-27 | 1 |
| 47 | <b>EW713316</b> | Q3TNK3_MOUSE | glutathione peroxidase 7                      | <i>M. musculus</i>        | 2e-13 | 1 |
| 48 | <b>EW713317</b> | WDR48_MOUSE  | WD repeat protein 48                          | <i>M. musculus</i>        | 1e-06 | 1 |
| 49 | <b>EW713318</b> | Q1RLC8_CIOIN | Zinc finger protein                           | <i>C. intestinalis</i>    | 2e-12 | 1 |
| 50 | <b>EW713319</b> | Q1RLF8_CIOIN | Zinc finger protein                           | <i>C. intestinalis</i>    | 6e-04 | 1 |
| 51 | <b>EW713320</b> | Q800Y7_MELGA | Hepatocyte growth factor activator            | <i>M. gallopavo</i>       | 5e-17 | 1 |
| 52 | <b>EW713321</b> | Q63274_RAT   | Kallikrein                                    | <i>R. norvegicus</i>      | 3e-10 | 1 |
| 53 | <b>EW713322</b> | Q6UKZ2_MOUSE | Serp1b3b                                      | <i>M. musculus</i>        | 3e-05 | 1 |
| 54 | <b>EW713323</b> | HTK16_HYDAT  | Tyrosine-protein kinase HTK16                 | <i>H. attenuata</i>       | 7e-24 | 1 |
| 55 | <b>EW713324</b> | Q4H323_CIOIN | Transcription factor protein                  | <i>C. intestinalis</i>    | 2e-08 | 1 |
| 56 | <b>EW713325</b> | TRIB2_HUMAN  | Tribbles homolog 2 (TRB-2)                    | <i>H. sapiens</i>         | 2e-22 | 1 |
| 57 | <b>EW713326</b> | Q9U6N1_MUSDO | Cytochrome P450                               | <i>M. domestica</i>       | 2e-07 | 1 |
| 58 | <b>EW713327</b> | Q1WDE8_PINPS | Rab1                                          | <i>P. pinaster</i>        | 6e-09 | 1 |
| 59 | <b>EW713328</b> | Q2TBV5_BOVIN | TFIIH                                         | <i>B. taurus</i>          | 5e-25 | 1 |
| 60 | <b>EW713329</b> | Q6J1M0_XENLA | Rap 1A2 GTPase                                | <i>X. laevis</i>          | 4e-16 | 1 |
| 61 | <b>EW713330</b> | Q17B38_AEDAE | Ins13/relaxin receptor                        | <i>A. aegypti</i>         | 6e-09 | 1 |
| 62 | <b>EW713331</b> | SPI1_PIG     | Transcription factor PU.1                     | <i>S. scrofa</i>          | 1e-09 | 1 |
| 63 | <b>EW713332</b> | ALDH9_POLMI  | Aldehyde dehydrogenase 9                      | <i>P. misakiensis</i>     | 1e-46 | 1 |
| 64 | <b>EW713333</b> | HMCN1_HUMAN  | Hemicentin-1 precursor (Fibulin-6)            | <i>H. sapiens</i>         | 1e-16 | 1 |
| 65 | <b>EW713334</b> | RAB33_CIOIN  | Ras-related protein Rab-33                    | <i>C. intestinalis</i>    | 9e-59 | 1 |
| 66 | <b>EW713335</b> | Q6WMS9_BRABE | Interferon gamma-inducible protein            | <i>D. rerio</i>           | 2e-29 | 1 |
| 67 | <b>EW713336</b> | Q7ZYY5_GASAC | Signal peptidase 25 kDa subunit               | <i>G. aculeatus</i>       | 8e-29 | 1 |
| 68 | <b>EW713337</b> | TIMP2_CAVPO  | Tissue inhibitor of metalloproteinases        | <i>C. porcellus</i>       | 7e-07 | 1 |
| 69 | <b>EW713338</b> | Q8R9K4_THETN | Putative translation initiation inhibitor     | <i>T. tengcongensis</i>   | 1e-16 | 1 |
| 70 | <b>EW713339</b> | SLIT3_HUMAN  | Slit homolog 3 protein precursor              | <i>H. sapiens</i>         | 9e-11 | 1 |
| 71 | <b>EW713340</b> | Q91WU4_MOUSE | Transmembrane and coiled-coil domains 4       | <i>M. musculus</i>        | 1e-24 | 1 |
| 72 | <b>EW713341</b> | Q5PP79_9ALPH | Secreted glycoprotein gG precursor            | <i>S. herpesvirus</i>     | 4e-04 | 1 |
| 73 | <b>EW713342</b> | WIPI4_BRARE  | WIPI-4                                        | <i>D. rerio</i>           | 1e-23 | 1 |
| 74 | <b>EW713343</b> | Q2DQL6_9DELT | ATP-NAD kinase                                | <i>G. uraniumreducens</i> | 3e-21 | 1 |
| 75 | <b>EW713344</b> | Q8AXP0_CYNPY | Receptor protein Notch1                       | <i>C. pyrrhogaster</i>    | 6e-22 | 1 |
| 76 | <b>EW713269</b> | Q9H9M5_HUMAN | thyroid hormone receptor-associated protein   | <i>H. sapiens</i>         | 1e-16 | 1 |
